# Supplementary material for: PtCl(PHCy2){(PCy2O)2H}: a hydrogen bonded phosphinito complex obtained by direct reaction of molecular oxygen with a terminal phosphido complexElectronic supplementary information (ESI) available: Fig. S1: ESI-MS positive spectrum of 2. Fig. S2: 1H NMR spectrum of 2 in the low-field region. Fig. S3: 195Pt{1H} NMR spectrum of 2. Fig. S4: 2-D 1H/195Pt XHCOR NMR spectrum of 2. Fig. S5: IR spectrum of 2 (Nujol mull). Fig. S6: 31P{1H} NMR spectrum of 2. Fig. S7: J-resolved 1H NMR spots of 2. Table S1: Spectroscopic features of 3. See http://www.rsc.org/suppdata/dt/b4/b402180k/
Source: Royal Society of Chemistry journal article supplement (doi:10.1039/b402180k), 2004-01-01
Supplement: b402180k.doc [file b402180k.doc]

ESI-MS positive spectrum of **2**. Drying gas flow 10 l min–1, nebulizer pressure 30 psi, drying gas temperature 100 °C, capillary voltage 4000 V, fragmentor voltage 100 V.


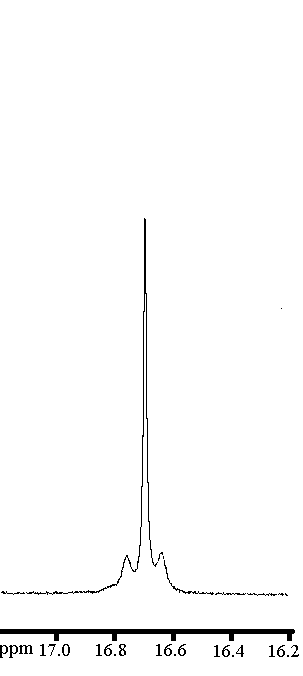


1H NMR spectrum of **2** in the low-field region (benzene-*d6*, 500 MHz, 295 K)


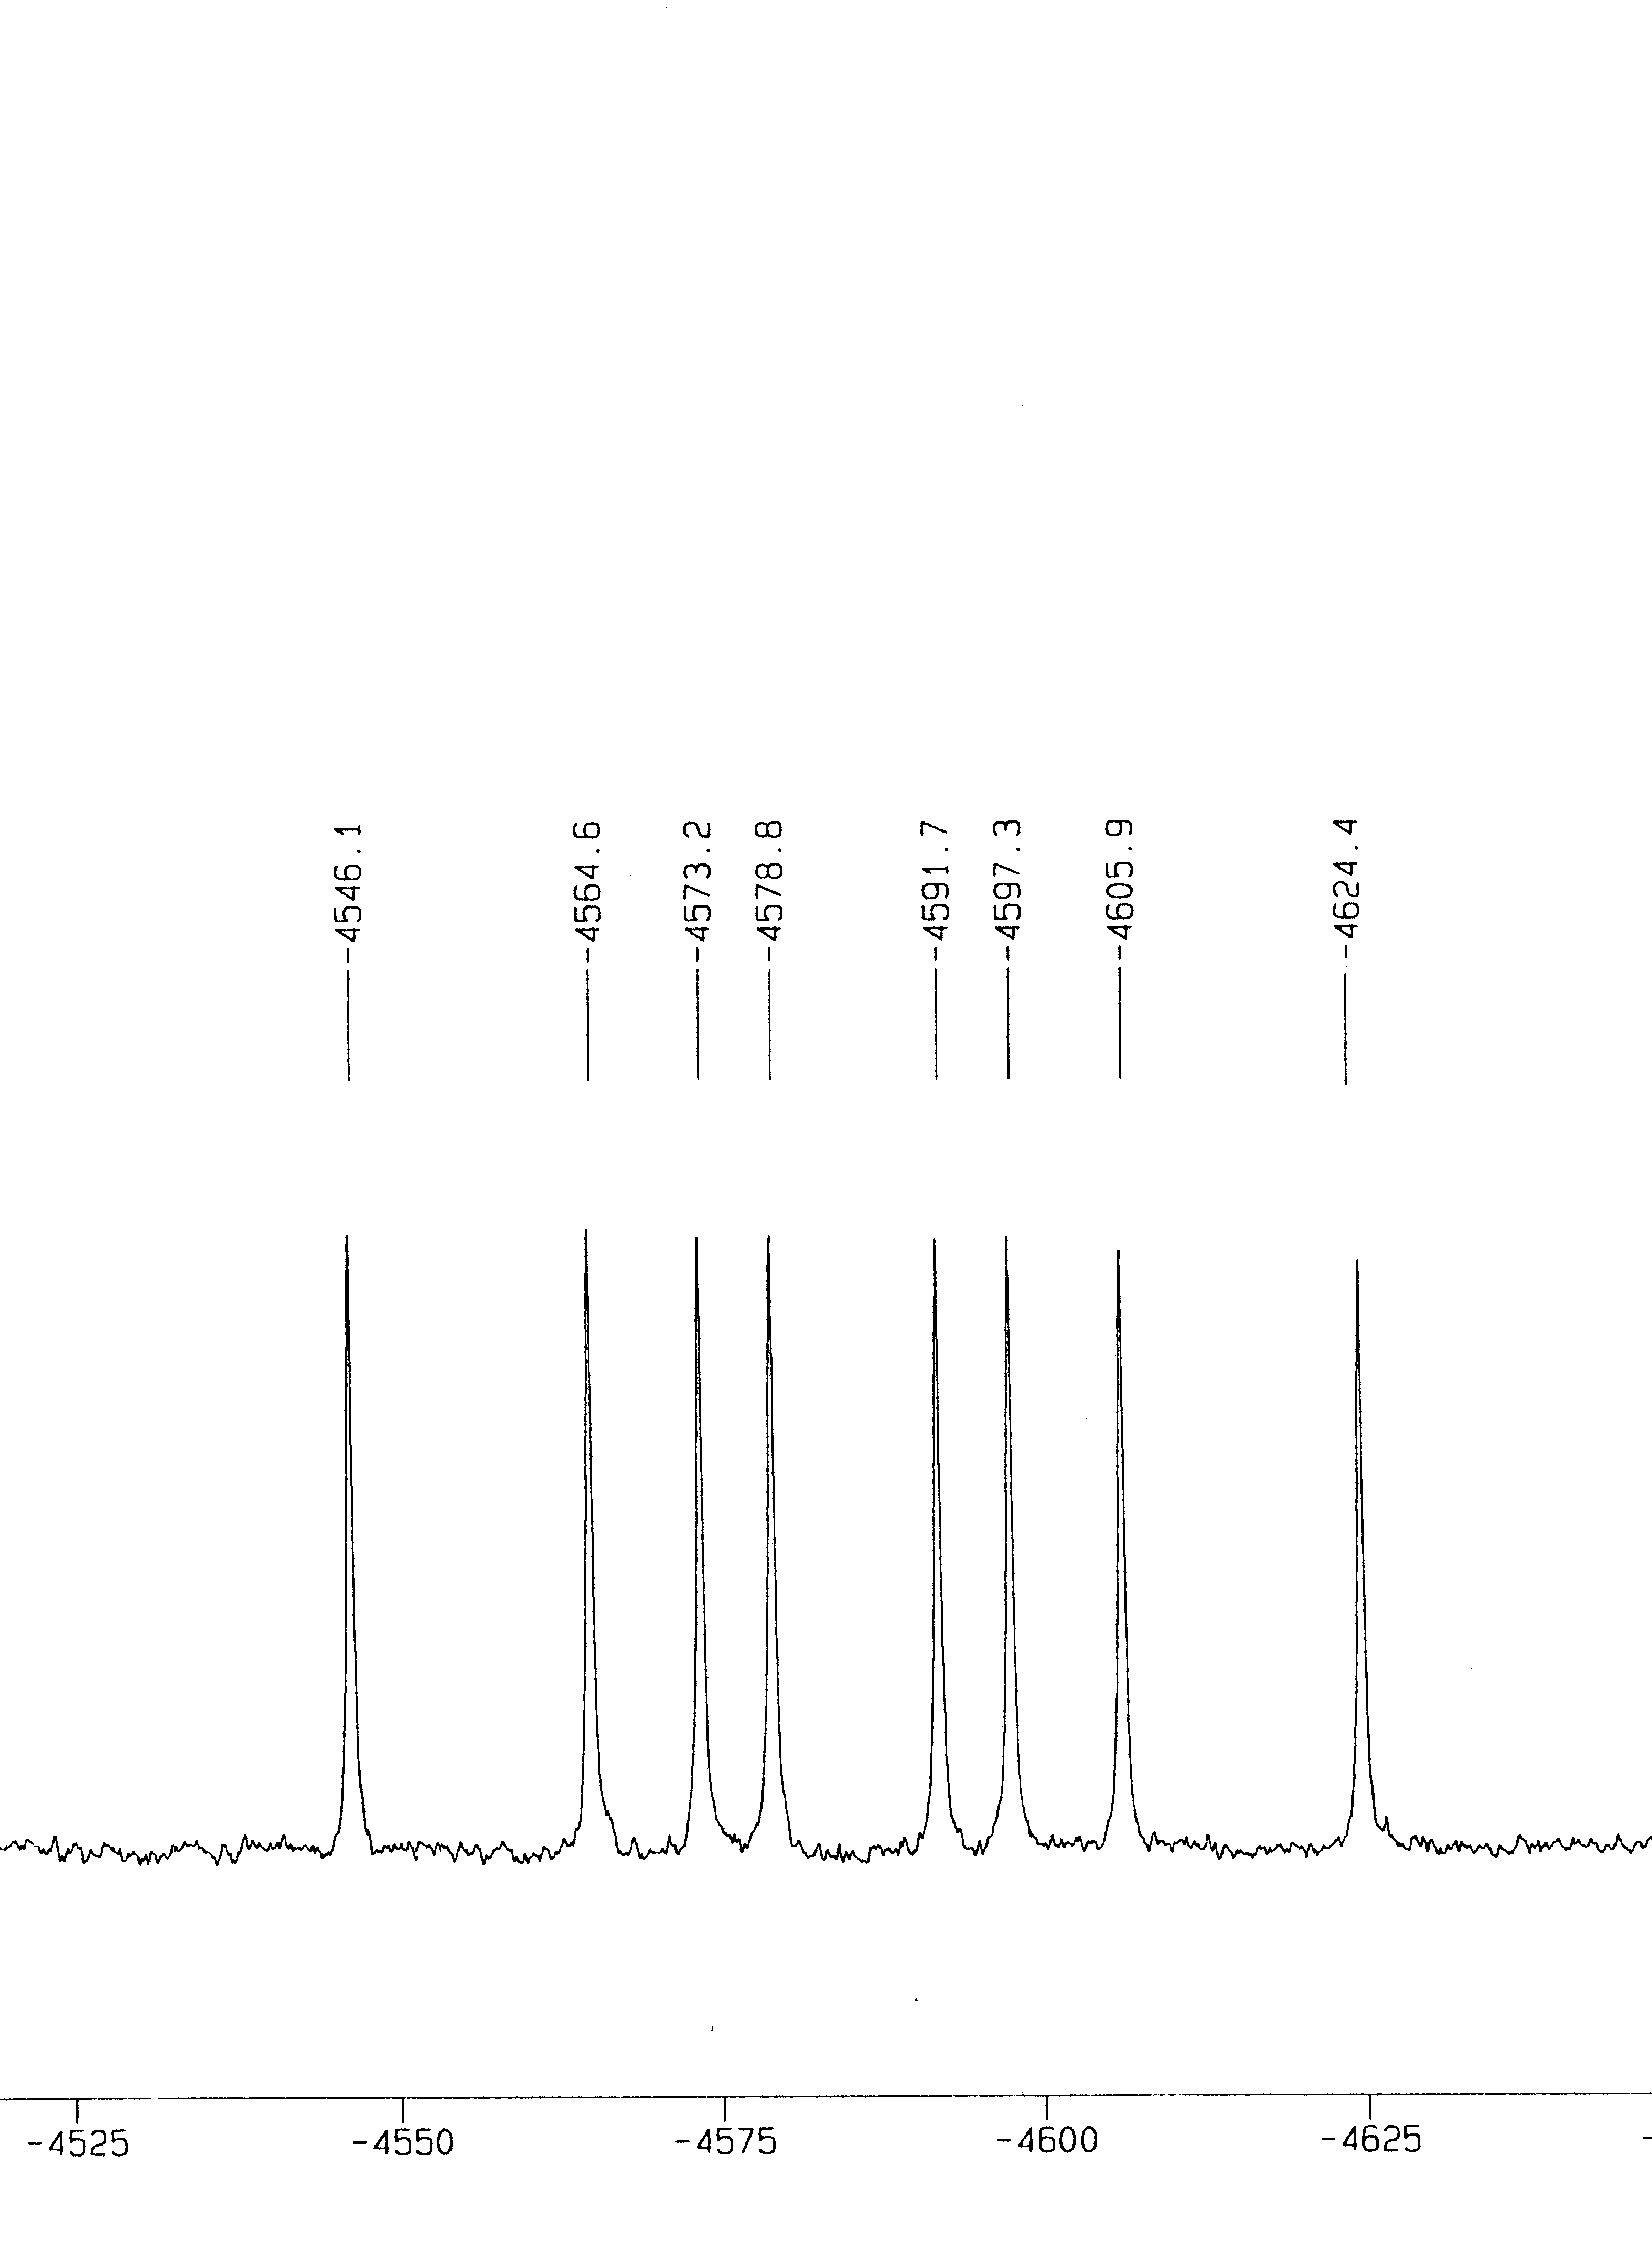


#### 195Pt{1H} NMR of 2 (benzene-*d6*, 107 MHz, 295 K)


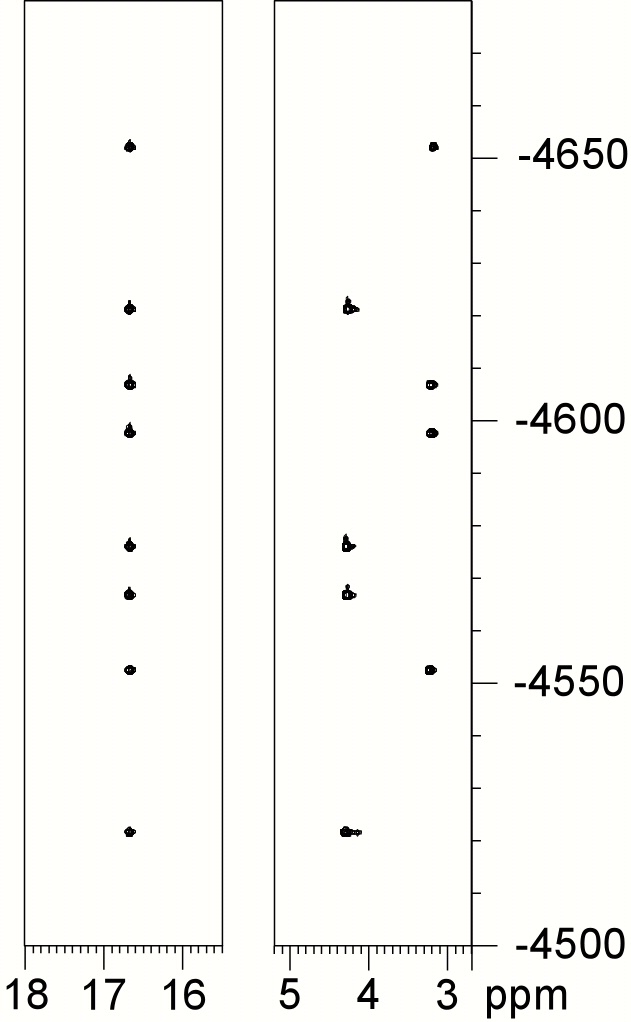


2-D 1H/195Pt XHCOR NMR spectrum of **2** (benzene-*d6*, 300 MHz, 295 K)

IR spectrum of **2** (nujol mull)


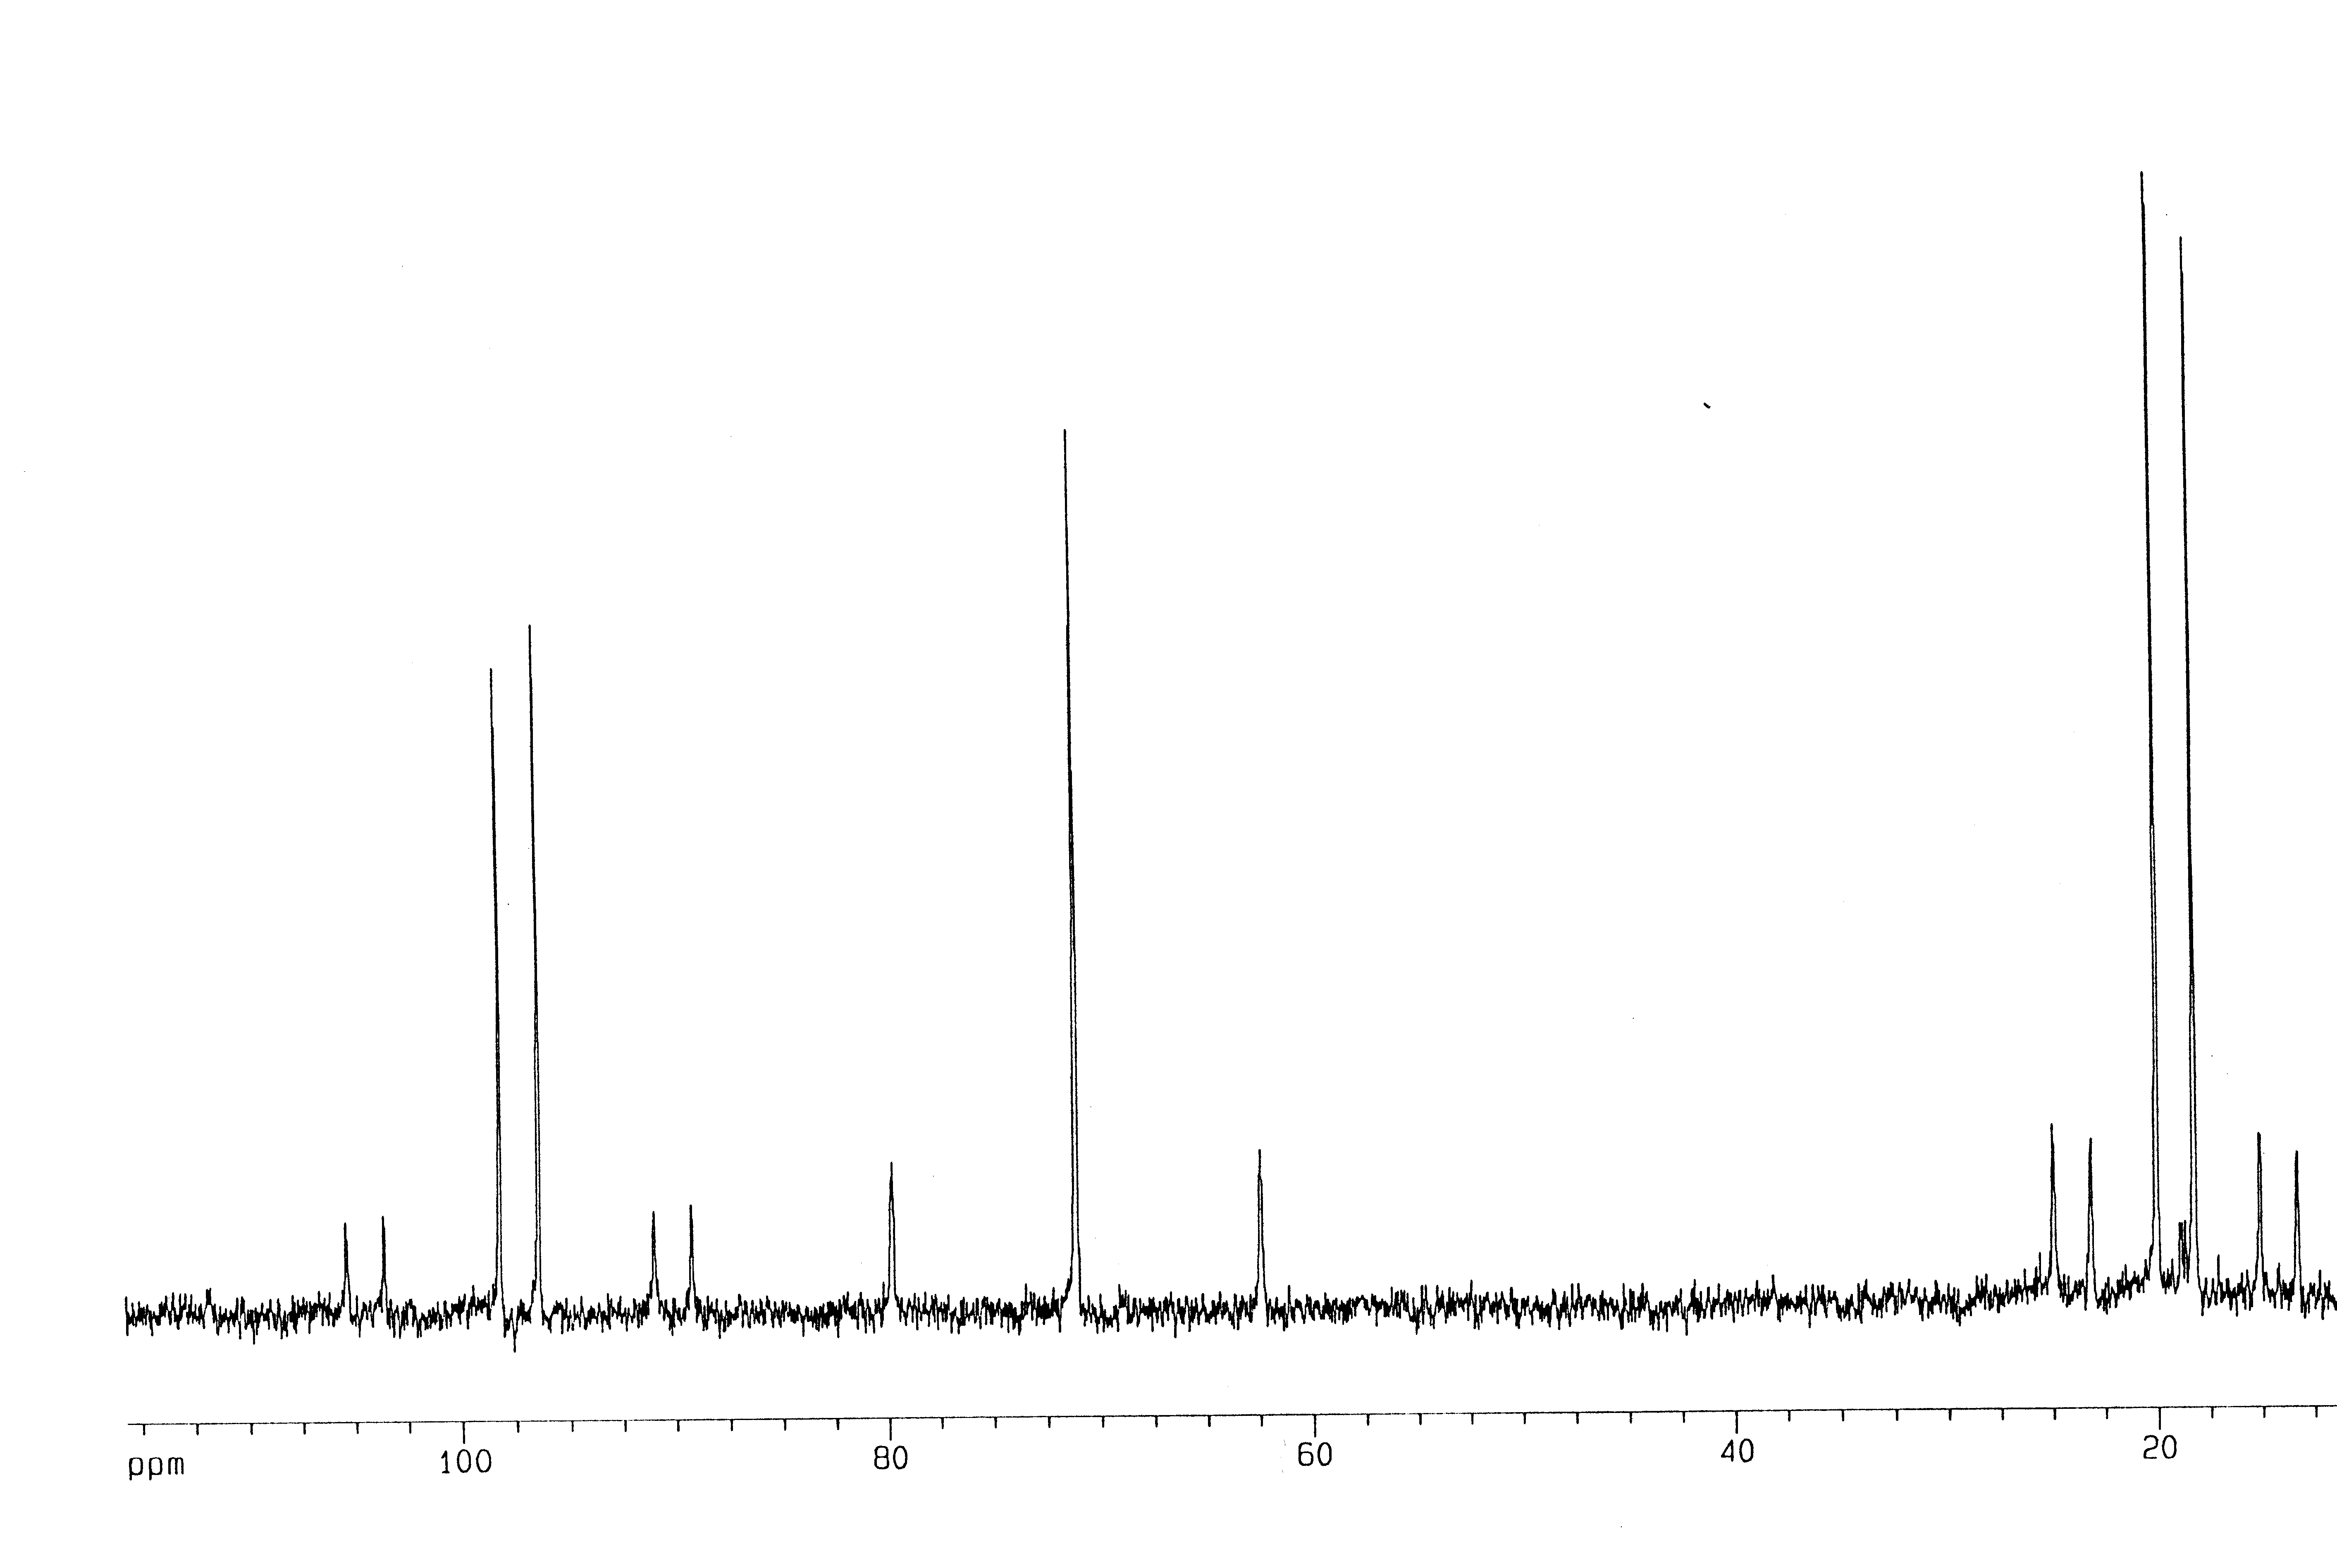


#### 31P{1H} NMR of 2 (benzene-*d6*, 202 MHz, 295 K)

15

15

0

1/2 *J* HH (Hz)


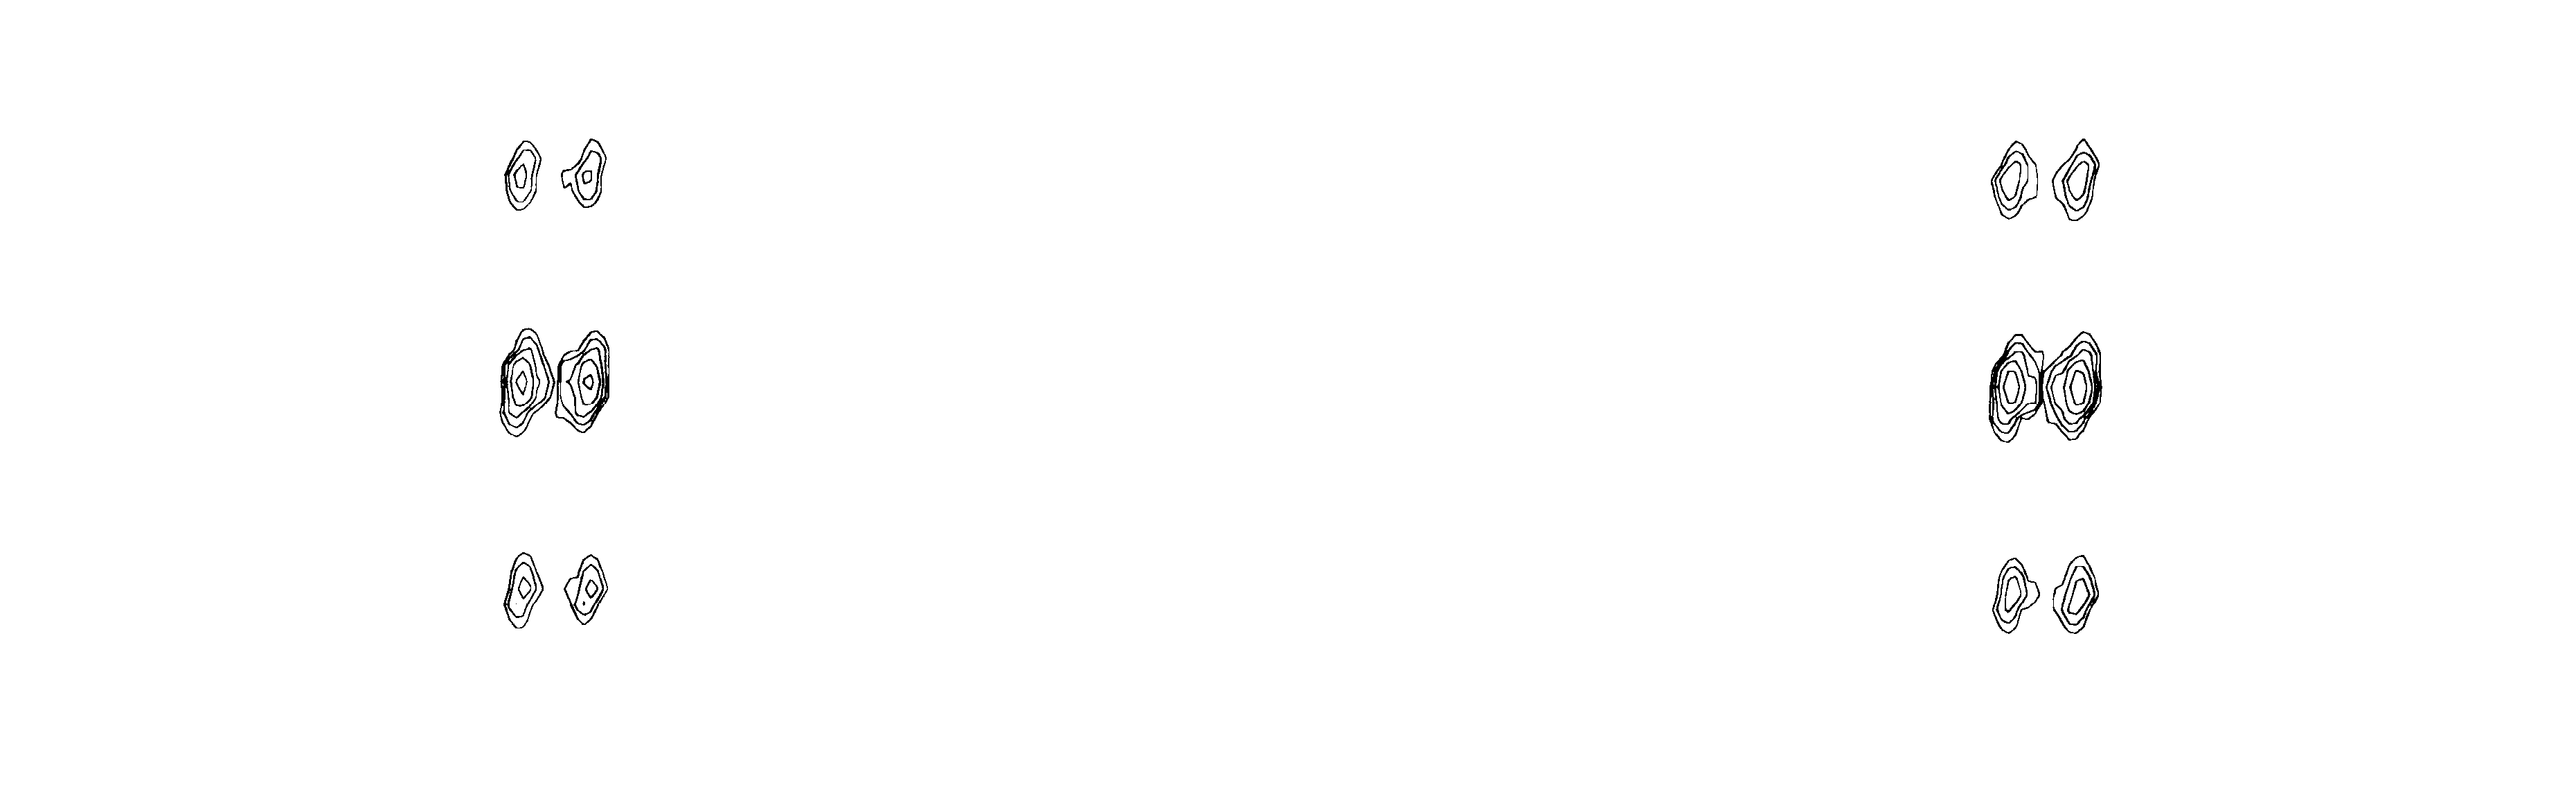


*J*-resolved 1H NMR spots of **2** (500 MHz, benzene-*d6*, PH region)

|  |  |
| --- | --- |
|  (P1) | 25.8 |
|  (P2) | 53.3 |
|  (H1) | 4.35 |
|  (Pt) | –4607 |
| 2J(P1–P2) | 15 |
| 2J(P1–P3) | 357 |
| 1J(P1–H1) | 368 |
| 2J(Pt–H1) | 97 |
| 1J(P2–Pt) | 3078 |
| 1J(P1–Pt) | 2868 |

Spectroscopic features of **3** (benzene-*d*6, 295 K). Chemical shifts are in ppm; coupling constants are in Hz. Solid state oxidation of **1** with dry dioxygen gave a crude composed of *ca.* 85% **2** and 15% **3** (31P NMR analysis).
